# Supplementary material
Source: PubMed Central journal article supplement (PMC8489925)
Supplement: KRNB_A_1857521_SM7066.pdf [file KRNB_A_1857521_SM7066.pdf]

**SUPPLEMENTARY INFORMATION****Table S1.** Yeast strains used in this study.

| Strain                | Relevant Genotype                                  | Source                             |
|-----------------------|----------------------------------------------------|------------------------------------|
| BY4741                | MATa <i>his3Δ1 leu2Δ met15Δ ura3Δ</i>              | Euroscarf                          |
| <i>xrn1Δ</i>          | BY4741 <i>xrn1Δ::KanMX4</i>                        | Euroscarf                          |
| Y836                  | BY4741 <i>xrn1Δ::(Ca)ura3Δ XRN1-WT</i>             | A gift from M. Choder <sup>1</sup> |
| Xrn1-wt-FLAG          | BY4741 <i>xrn1Δ::(Ca)ura3Δ::XRN1-FLAG</i>          | A gift from M. Choder <sup>1</sup> |
| LMY5.2 (HA-TFIIS)     | BY4741 <i>TRP1::pADH::3HA::TFIIS</i>               | (33)                               |
| HA-TFIIS <i>xrn1Δ</i> | BY4741 <i>TRP1::pADH::3HA::TFIIS xrn1Δ::KanMX4</i> | (55)                               |
| SPT5-myc              | BY4741 <i>SPT5-myc::HPH</i>                        | A gift from S. Chavez <sup>2</sup> |
| SPT5-myc <i>xrn1Δ</i> | BY4741 <i>SPT5-myc::HPH xrn1Δ:: KanMX4</i>         | A gift from S. Chavez <sup>2</sup> |

<sup>1</sup> Technion-Israel Institute of Technology, Israel<sup>2</sup> Instituto de Biomedicina de Sevilla, Universidad de Sevilla, Spain**Table S2.** List of primers used in this study.

| Primer      | Sequence                            | Use                          |
|-------------|-------------------------------------|------------------------------|
| STL1TATA-1  | 5'-TTTTGTCCCCTTCAACGCTG-3'          | QPCR of <i>STL1</i> promoter |
| STL1-2      | 5'-TATGAGTGTGACTACTCCTG-3'          | QPCR of <i>STL1</i> promoter |
| 3-STL1-5b   | 5'-CCGGAAGAAGTTTGGAGGAA-3'          | QPCR of <i>STL1</i> ORF      |
| 3-STL1-3c   | 5'-GGGCAAATGGTTAGCAACTC-3'          | QPCR of <i>STL1</i> ORF      |
| GRE3-7      | 5'-GGGGGCCTATCAAGTAAATT-3'          | QPCR of <i>GRE3</i> promoter |
| 5-GRE3-2    | 5'-GAAGGATTGCACTGACAACT-3'          | QPCR of <i>GRE3</i> promoter |
| GRE3-1      | 5'-CAAACCATCCAGGCAGTAC-3'           | QPCR of <i>GRE3</i> ORF      |
| GRE3-2      | 5'-CTCTCTGAGTTGCCCATCTA-3'          | QPCR of <i>GRE3</i> ORF      |
| GAL1-ORF3 F | 5'-ATCCGGCATCGAACGGTTA-3'           | QPCR of <i>GAL1</i> ORF      |
| GAL1-ORF3 R | 5'-TCAAGGATTGTGCGACATCG-3'          | QPCR of <i>GAL1</i> ORF      |
| M1          | 5'-TCGTTCCAATTTACGCTGGTT-3'         | QPCR of <i>ACT1</i> ORF      |
| M2          | 5'-CGGCCAAATCGATTCTCAA-3'           | QPCR of <i>ACT1</i> ORF      |
| 18S-F       | 5'-CATGGCCGTTCTTAGTTG GT-3'         | QPCR of rRNA 18S             |
| 18S-R       | 5'-ATTGCCTCAAACCTTCCATCG-3'         | QPCR of rRNA 18S             |
| M11         | 5'-ACTTCCAGGTGGTAACAACGAA -3'       | QPCR of <i>RPL30</i> ORF     |
| M12         | 5'-AAATAGAGACAACACCGACTCTGAATAA -3' | QPCR of <i>RPL30</i> ORF     |

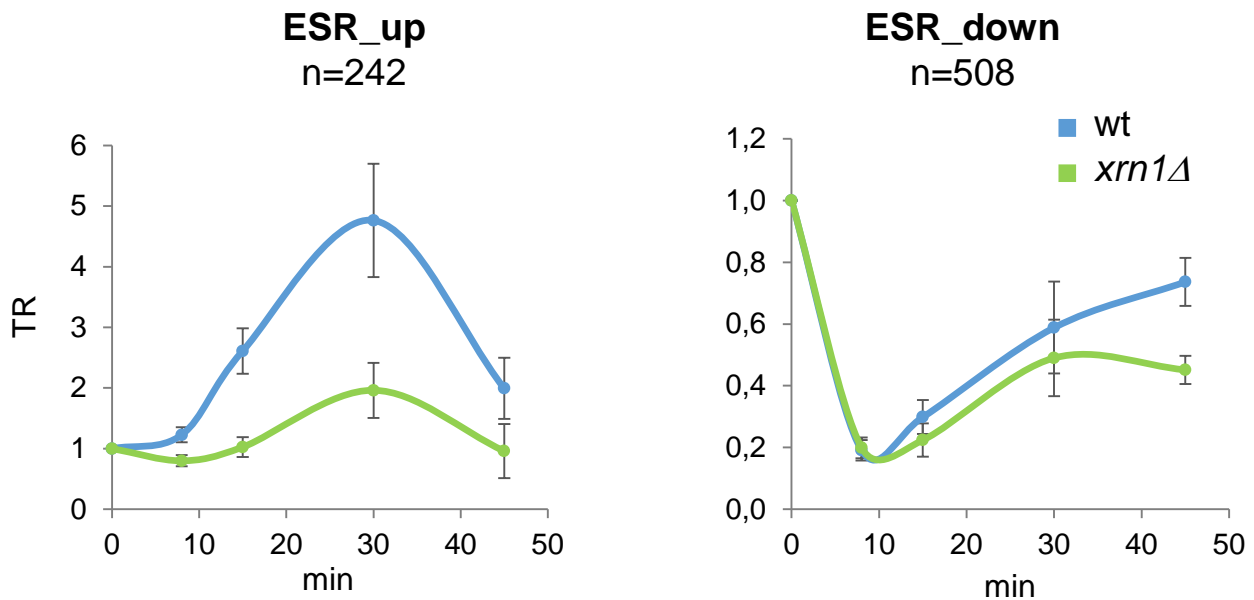

**Supplementary Figure S1. The absence of Xrn1 reduces the transcriptional ESR during osmotic stress.** Genomic data were obtained for wt and *xrn1Δ* treated with 0.6 M KCl for 0, 8, 15, 30 and 45 min as indicated in Figure 1. Graphical representation of the TR medians and standard deviation for ESR genes (as defined in (59)) upregulated (242 genes, left panel) and ESR downregulated (508 genes, right panel) in response to osmotic stress. All data were normalized to an arbitrary value of 1 at t=0.

**Figure S1**

**A**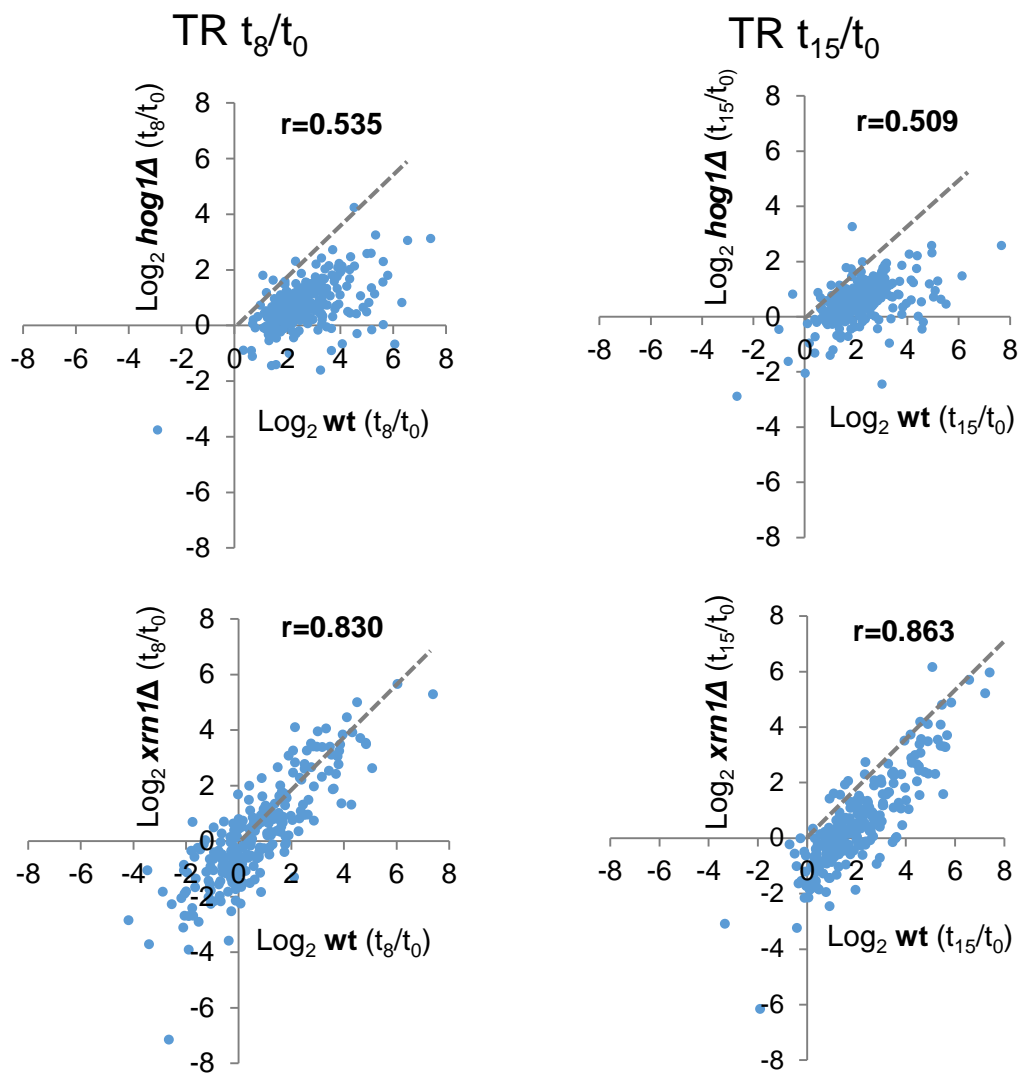**B**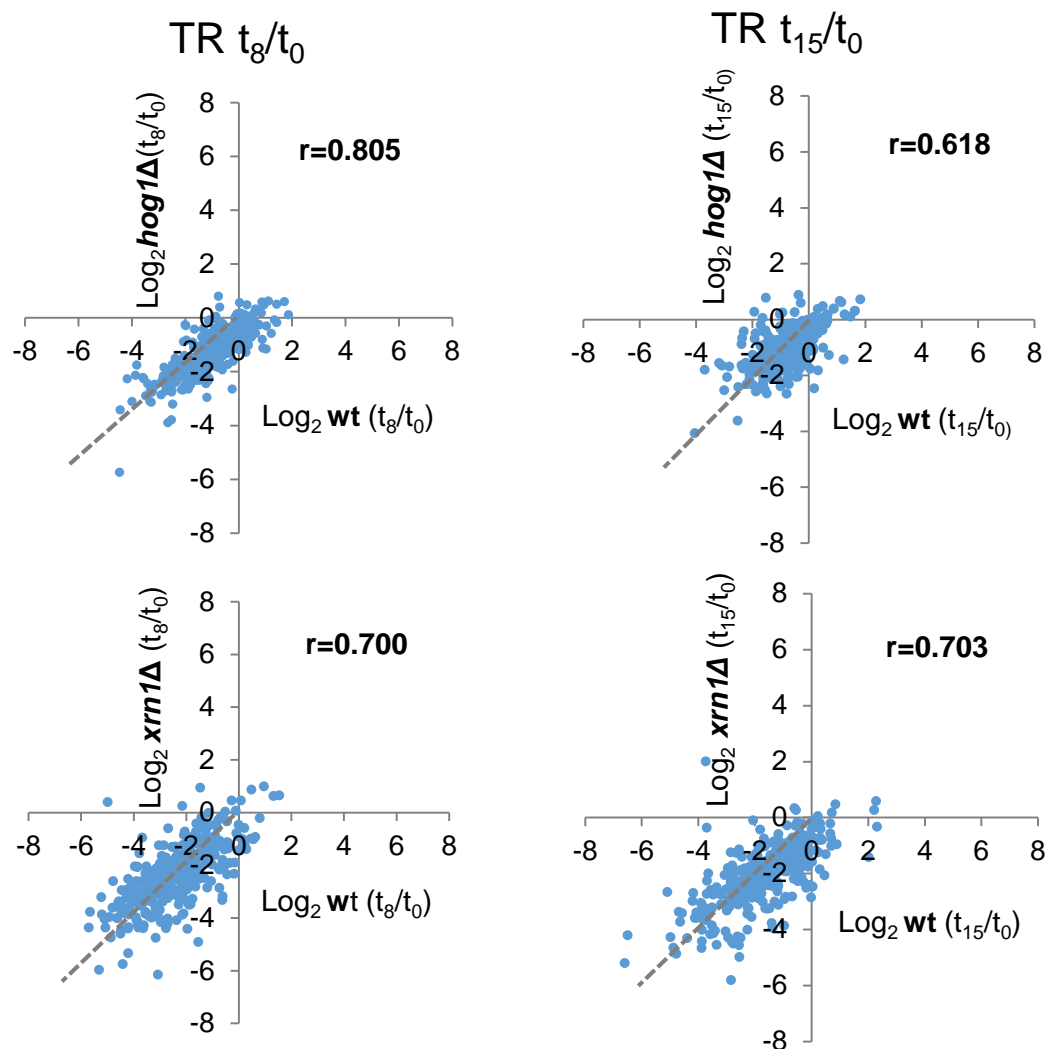**Figure S2**

**Supplementary Figure S2. Comparison of the transcriptional response to osmotic stress of *hog1* and *xrn1Δ* mutants vs. wt.** (A, B) Genomic TR data obtained with *hog1* (8) (upper panels) and *xrn1Δ* (this work) (lower panels) mutants at 8 min (left panels) and 15 min (right panels) of mild osmotic stress was compared to the data obtained with the wild type in each experiment. The ratios of TR at t=8 or 15 min vs. t=0 (plotted in  $\log_2$  scale) for each mutant were represented respect the same ratio for the wild type for the common set of upregulated genes (A) and downregulated genes (B) in both experiments ((8) and this work). The Pearson correlation coefficient ( $r$ ) for each comparison is given.

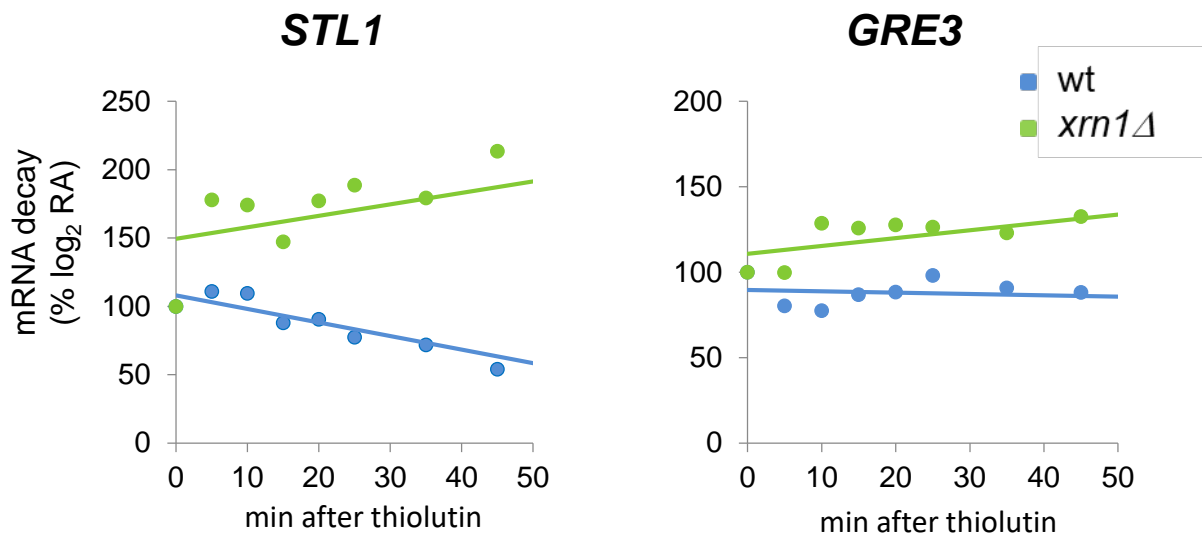

**Supplementary Figure S3. Estimation of *STL1* and *GRE3* mRNA stability upon osmotic stress in wt and *xrn1Δ* strains.** Cells were treated with 0.6 M KCl for 30 min and then 5  $\mu$ g/mL of thiolutin was added to stop transcription and samples were taken at different times. Samples were analysed by RT-qPCR using specific primers for *STL1* and *GRE3* (see Supplementary Table S2) and normalized using the 18S RNA. Data are presented as the percentage of the log<sub>2</sub> of the mRNA and it is represented respect to the initial (100%) over time. One representative experiment is shown, similar to the one in Figure 4C.

**Figure S3**

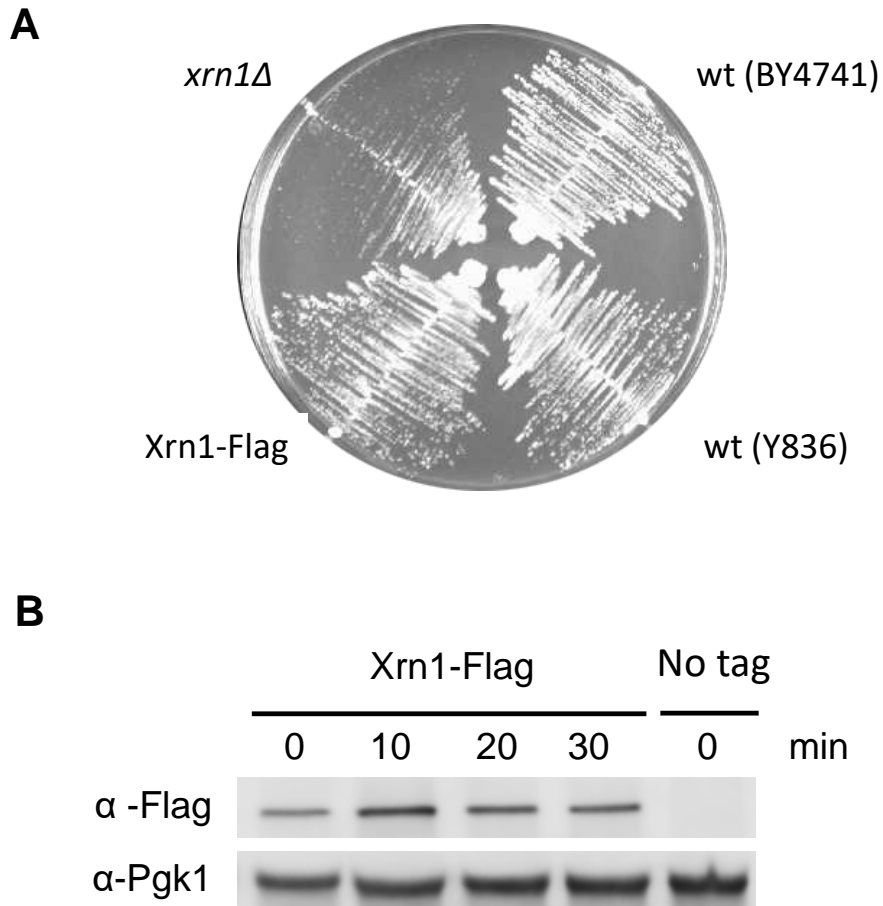

**Supplementary Figure S4. Functionality of Xrn1-Flag.** (A) Growth on YPD plate of *xrn1Δ* mutant and its corresponding wt strain (BY4741) and of Xrn1-Flag version and its corresponding wt strain (Y836) (see strains in Supplementary Table S1). The reduced growth of the *xrn1Δ* mutant strain but not of the Xrn1-Flag strain can be observed. (B) Expression of Xrn1-Flag protein under osmotic stress conditions analysed by western blot using anti-Flag antibodies. Anti-Pgk1 antibody was used as loading control. The samples were taken at different times of 0.6 M KCl treatment.

**Figure S4**
